# Supplementary material for: Construction of a sustained-release hydrogel using gallic acid and lysozyme with antimicrobial properties for wound treatment
Source: Royal Society of Chemistry journal article supplement (doi:10.1039/d2bm00658h), 2022-01-01
Supplement: d2bm00658h1.pdf [file d2bm00658h1.pdf]

1  
2  
3  
4  
5  
6  
7  
8  
9  
10  
11  
12  
13  
14

**Supplementary Information**

**Construction of sustained release hydrogel using gallic acid and lysozyme with  
antimicrobial properties for wound treatment**

Wei Gong<sup>#1</sup>, Hai-bo Huang<sup>#2</sup>, Xin-chuang Wang<sup>1</sup>, Wan-ying He<sup>1</sup>, Yi-yang Hou<sup>1</sup>,  
Jiang-ning Hu<sup>\*1,2</sup>

<sup>1</sup>School of Food Science and Technology, Dalian Polytechnic University, Dalian  
116034, China

<sup>2</sup>Collaborative Innovation Center of Seafood Deep Processing, Dalian Polytechnic  
University, Dalian 116034, China

#These authors contributed equally: Wei Gong, Hai-bo Huang;

\*Correspondence and requests for materials should be addressed to Prof. Jiangning  
Hu (Email: [hujiangning2005@hotmail.com](mailto:hujiangning2005@hotmail.com) )

15 **Table S1.** Sequence of Primers for q-PCR

16

| Target gene      | Primer sequence          |
|------------------|--------------------------|
| GADPH-F          | AACTTTGGCATTGTGGAAGG     |
| GADPH-R          | ACACATTGGGGGTAGGAACA     |
| IL-6-F           | TGGAAATGAGAAAAGAGTTGTGC  |
| IL-6-R           | CCAGTTTGGTAGCATCCATCA    |
| TNF- $\alpha$ -F | ATCTACCTGGGAGGCGTCTT     |
| TNF- $\alpha$ -R | GAGTGGCACAAGGAACTGGT     |
| IL-1 $\beta$ -F  | TTCATCTTTGAAGAAGAGCCCAT  |
| IL-1 $\beta$ -R  | TCGGAGCCTGTAGTGCAGTT     |
| TGF- $\beta$ -F  | TGGAGCAACATGTGGAACTC     |
| TGF- $\beta$ -R  | TGCCGTACAACCTCCAGTGAC    |
| NLRP3-F          | ATCAACAGGCGAGACCTCTG     |
| NLRP3-R          | GTCCTCCTGGCATAACCATAGA   |
| HO-1-F           | CACGCATATACCCGCTACCT     |
| HO-1-R           | CCAGAGTGTTTCATTCGAGCA    |
| Nrf2-F           | CTTCCATTTACGGAGACCCAC    |
| Nrf2-R           | GATTCACGCATAGGAGCACTG    |
| iNOS-F           | TTTCTGTGCTGTGCTACAGTT    |
| iNOS-R           | CCACTCGTATTTGGGATGCT     |
| COX2-F           | GGTGCCTGGTCTGATGATGTATGC |
| COX2-R           | GGATGCTCCTGCTTGAGTATGTCG |
| MCP-1-F          | CCACTCACCTGCTGCTACTCATTC |
| MCP-1-R          | CTTCTTTGGGACACCTGCTGCTG  |
| TLR4-F           | CCGCTTTCACCTCTGCCTTCAC   |
| TLR4-R           | ACCACAATAACCTTCCGGCTCTTG |
| STAT3-F          | AATCTCAACTTCAGACCCGCCAAC |
| STAT3-R          | GCTCCACGATCCTCTCCTCCAG   |
| Claudin-1-F      | AGTGCATGAGGTGCCTGGAAG    |
| Claudin-1-R      | TGGCCACTAATGTCGCCAGA     |
| Occludin-F       | GGCAAGCGATCATAACCAGAG    |
| Occludin-R       | AGGCTGCCTGAAGTCATCCAC    |

ZO-1-F

GACCAATAGCTGATGTTGCCAGAG

ZO-1-R

TATGAAGGCGAATGATGCCAGA

---

17  
18  
19  
20  
21  
22  
23  
24  
25  
26  
27  
28  
29  
30  
31  
32  
33  
34  
35  
36  
37  
38  
39  
40  
41  
42  
43  
44  
45  
46  
47  
48  
49  
50  
51  
52  
53  
54  
55  
56  
57  
58

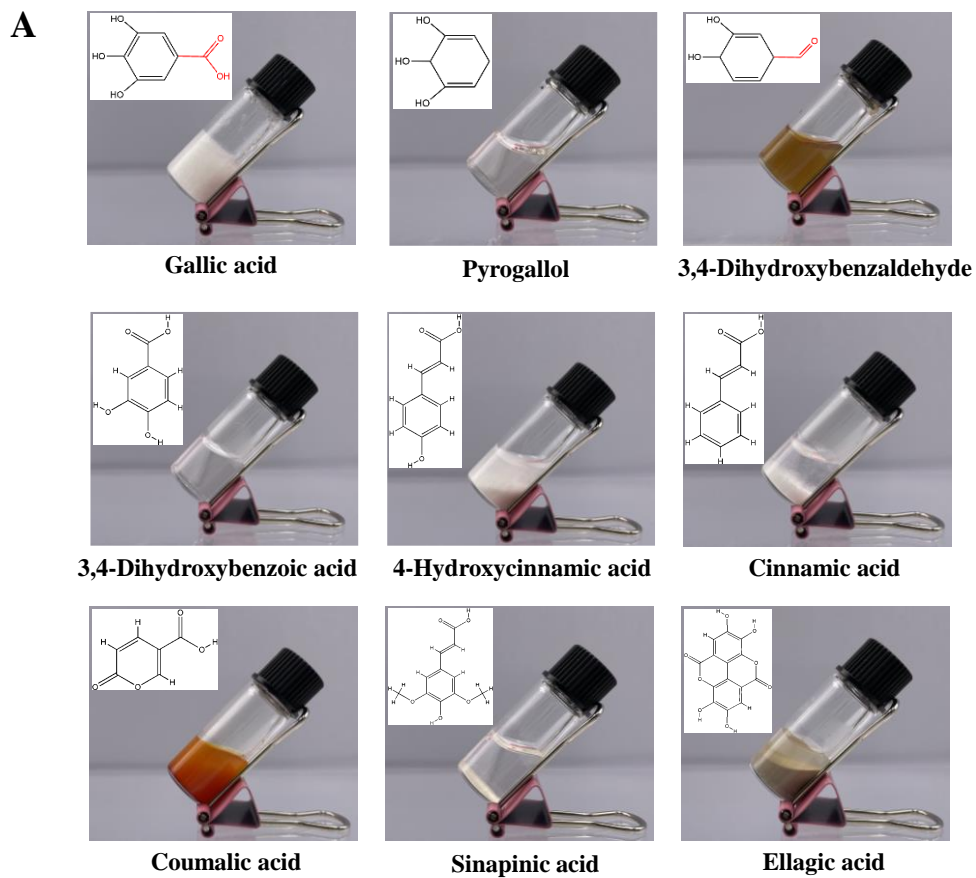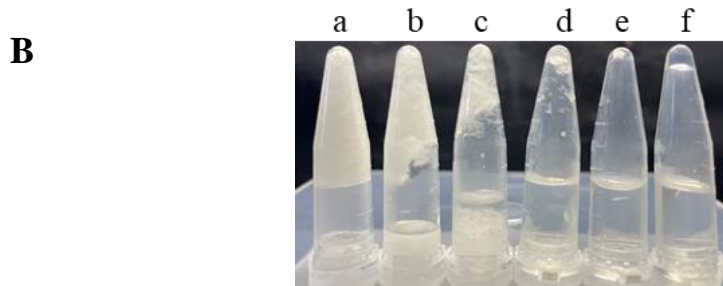

60

61 **Fig. S1. (A)** Schematic diagram of different small molecule acids (60mg/ml) after co-incubation  
 62 with lysozyme (1mg/ml). **(B)** Different ratio between gallic acid and lysozyme more detail. Where  
 63 a represents the ratio of gallic acid to lysozyme is 60:1, b represents 55:1, c represents 55:1.5, d  
 64 represents 55:2, e represents 50:1, f represents 40:1, respectively.

65

66

67

68

69

70

71

72

73

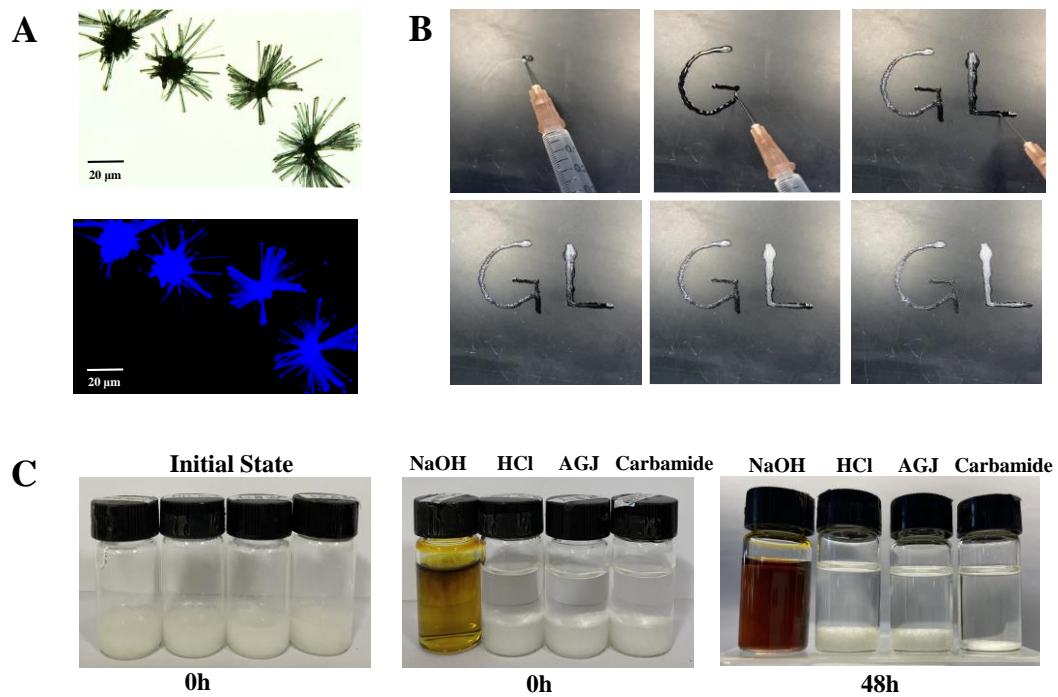

75

76 **Fig. S2.** (A) Inverted fluorescence microscope images showing blue fluorescent fiber of GL  
 77 hydrogel. (B) Injection behavior and in situ formation of GL hydrogel. (C) The stability of GL  
 78 hydrogel in acidic (0.01mol/L HCl), alkaline (1mol/L NaOH), artificial gastric juice (AGJ) and  
 79 50 % carbamide solution.

80

81

82

83

84

85

86

87

88

89

90

91

92

93

94

95

96

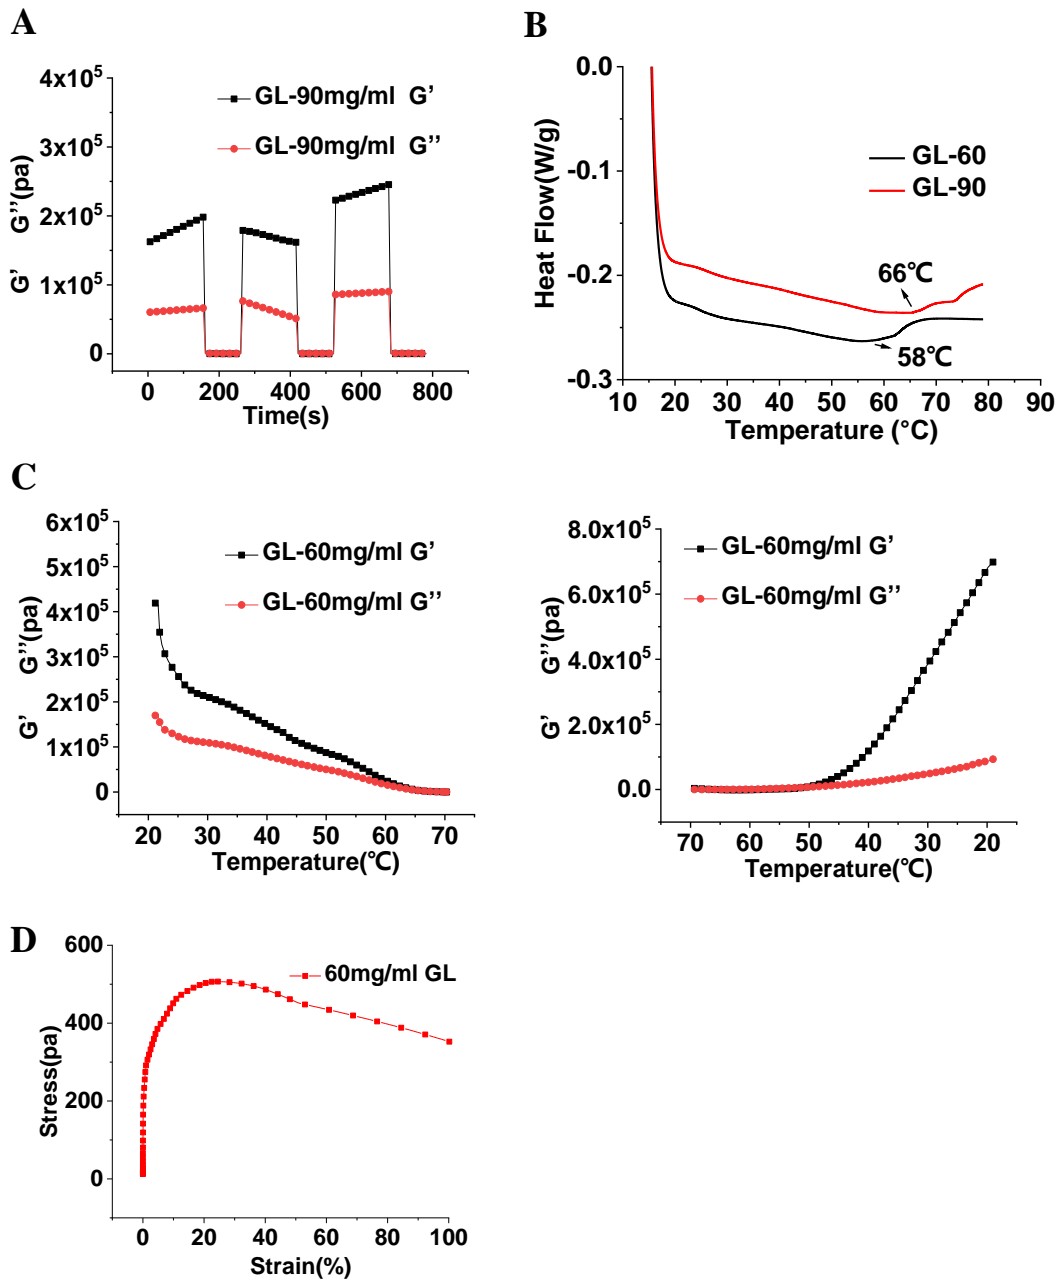

97  
 98 **Fig. S3.** (A) Step-strain measurements of the hydrogel three cycles at low strain (0.01%) and high  
 99 strain (10%), frequency 10 Hz. (B) DSC thermogram of the GL hydrogel with the concentration of  
 100 60 mg/ml and 90 mg/ml (heating rate of  $dT / dt = 5 \text{ }^{\circ}\text{C}/\text{min}$ , 10  $\mu\text{l}$  aluminum crucibles under  $\text{N}_2$   
 101 atmosphere). (C) The responsiveness in environment of GL hydrogel at different temperatures,  
 102 fixed frequency (10 Hz) and strain (0.01%). (D) The curve of stress and strain under  $0.1 \text{ s}^{-1}$  shear  
 103 rate. The rheological measurement mode is stress growth.

104  
 105  
 106  
 107  
 108  
 109

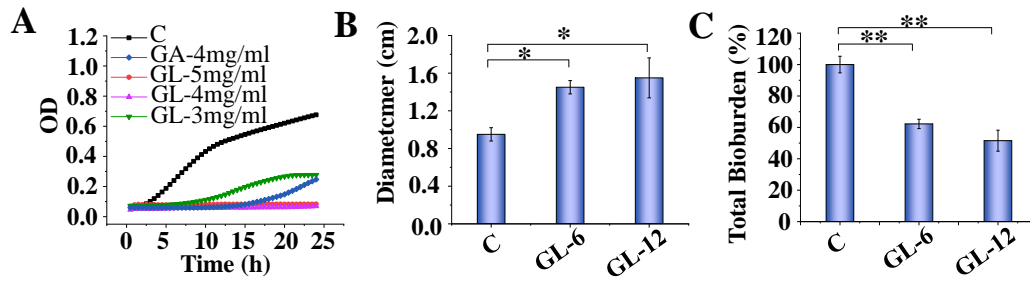

110

111 **Fig. S4.** *In vitro* antibacterial activities of the GL hydrogel against *S. aureus*. (A) Kinetics of the  
 112 inhibition of bacterial growth. The effect of the GL hydrogel and controls on bacterial growth was  
 113 evaluated by turbidity analysis via absorbance readings at 600 nm of bacteria treated overnight  
 114 under 30 °C. (B) Bacteriostatic zone diameter of bacteria treated with GL hydrogel of 0 mg/ml (C),  
 115 6mg/ml (GL-6), 12mg/ml (GL-12), respectively. (C) Antibacterial biofilm effect of GL hydrogel  
 116 of 0 mg/ml (C), 6mg/ml (GL-6), 12mg/ml (GL-12), respectively.

117

118

119

120

121

122

123

124

125

126

127

128

129

130

131

132

133

134

135

136

137

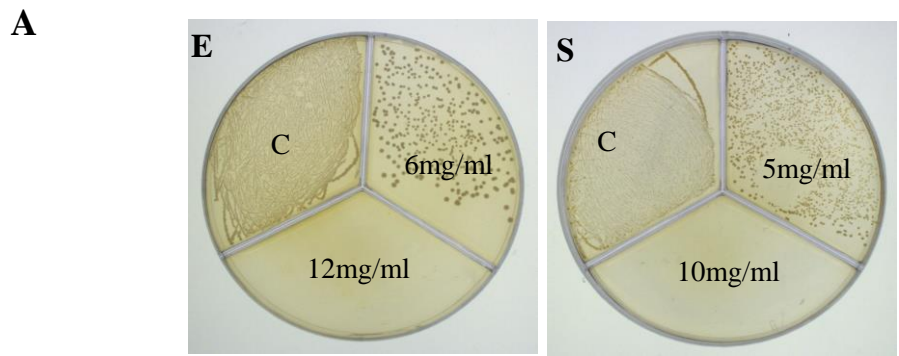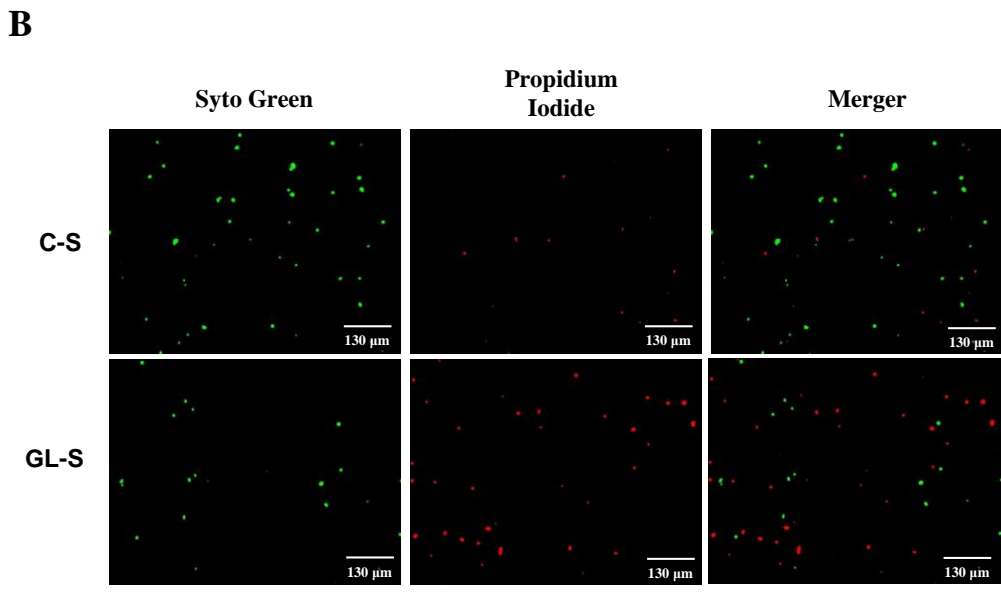

138  
139  
140  
141  
142  
143  
144  
145  
146  
147  
148  
149  
150  
151  
152  
153  
154  
155

**Fig. S5.** (A) Minimum bactericidal concentration of *E. coli* (E) and *S. aureus* (S) treated with different concentrations of GL hydrogel. (B) Live/dead bacterial viability assay in *S. aureus* treated with GL hydrogel. Bacterial cells with intact membrane are stained green, and bacteria with compromised membrane are stained red.



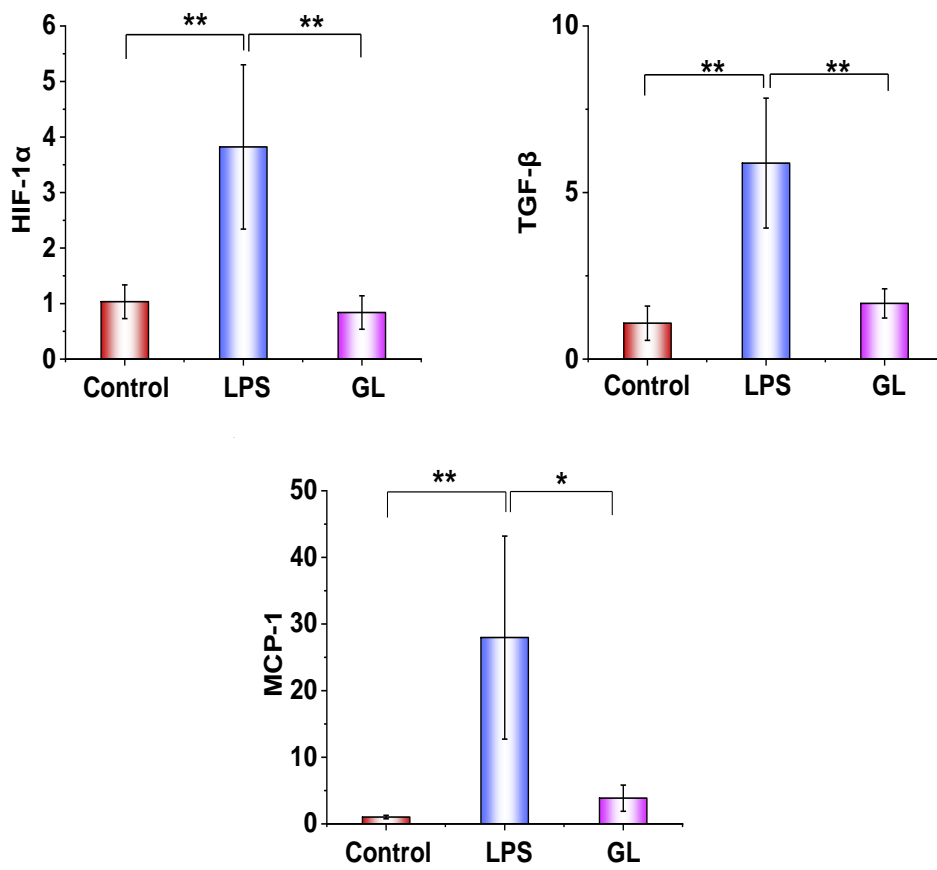

156

157 **Fig. S6.** Expression levels of HIF-1 $\alpha$ , TGF- $\beta$  and MCP-1 in RAW 264.7 cells after treatment with  
 158 LPS and GL hydrogel. Used q-PCR method and normalized using GADPH as the housekeeping  
 159 gene.

160

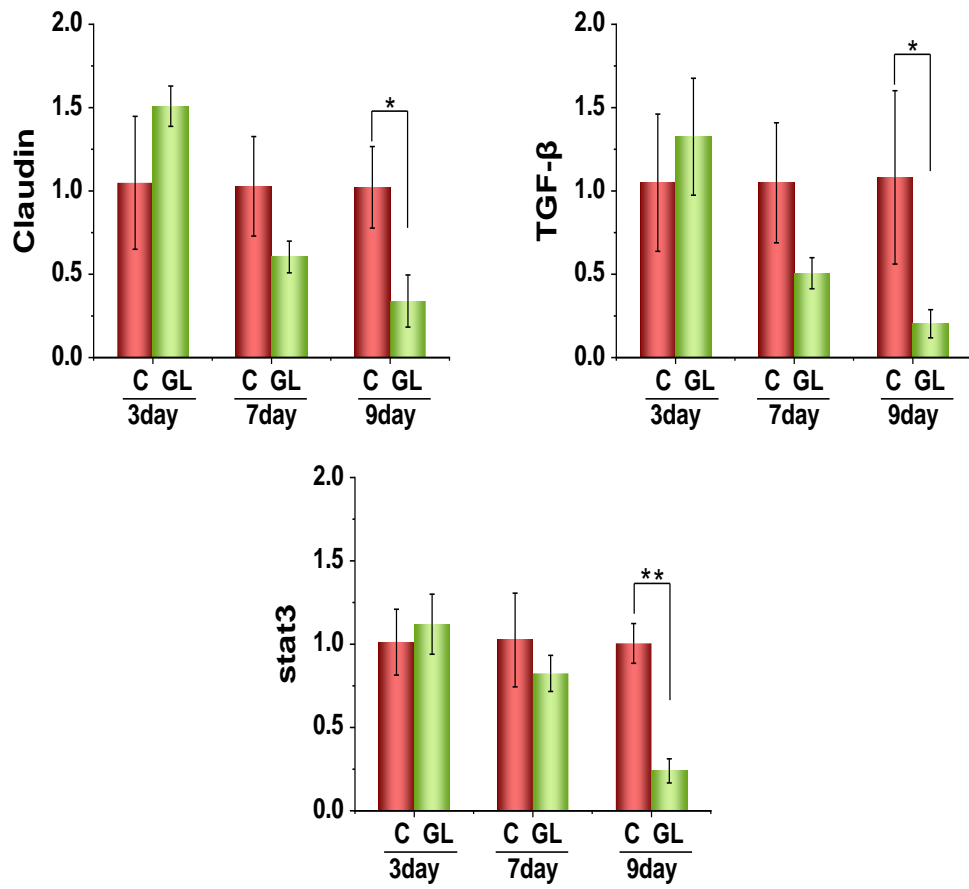

161

162 **Fig. S7.** Expression levels of Claudin, TGF-β and stat3 in skin tissues from control or GL  
 163 hydrogel groups on days 3, 7 and 9. Used q-PCR method and normalized using GADPH as the  
 164 housekeeping gene.

165

166

167

168

169

170

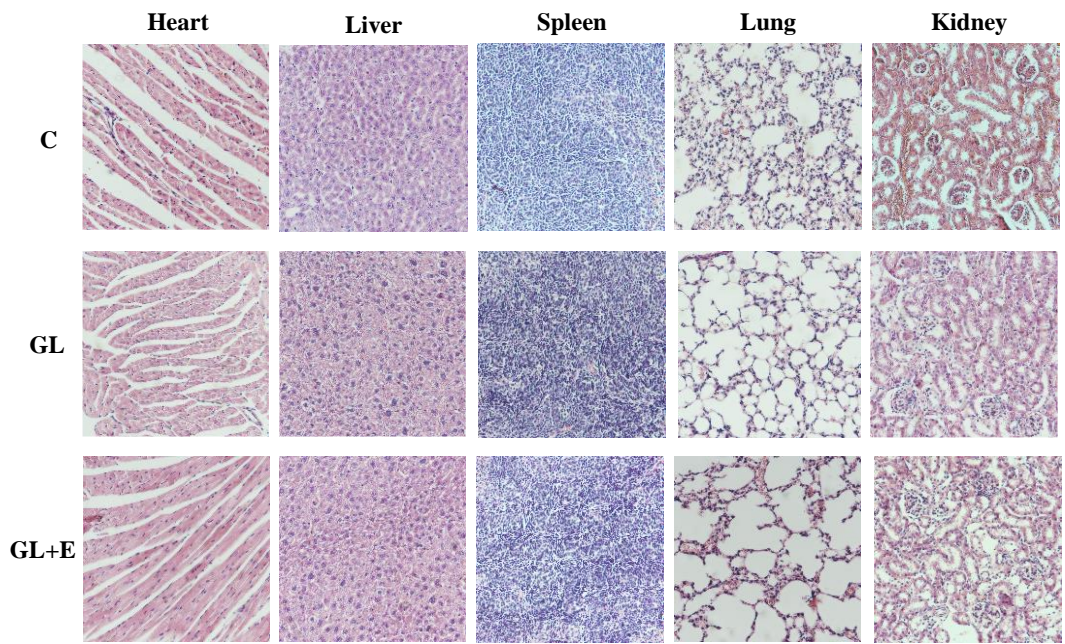

171

172 **Fig. S8.** Micrographs of H & E stain major organ tissue slices from different groups  
 173 after 9d of treatment.

174
